# Supplementary material for: 6-Bromoindirubin-3′-Oxime Regulates Colony Formation, Apoptosis, and Odonto/Osteogenic Differentiation in Human Dental Pulp Stem Cells
Source: MDPI journal article supplement (doi:10.3390/ijms23158676), 2022-08-04
Supplement: s1 [file s1]

**6-bromoindirubin-3'-oxime regulates colony formation, apoptosis, and odonto/osteogenic differentiation in human dental pulp stem cells**

Chatvadee Kornsutthisopon<sup>1</sup>, Sunisa Rochanavibhata<sup>2</sup>, Nunthawan Nowwarote<sup>3</sup>, Kevin A. Tompkins<sup>4</sup>, Waleerat Sukarawan<sup>1</sup>, Thanaphum Osathanon<sup>1,5</sup>

<sup>1</sup>Dental Stem Cell Biology Research Unit, Faculty of Dentistry, Chulalongkorn University, Bangkok Thailand 10330

<sup>2</sup>Department of Oral and Maxillofacial Surgery, Faculty of Dentistry, Chulalongkorn University, Bangkok Thailand 10330

<sup>3</sup>Universite Paris Cite, Faculty of Dentistry, Department of Oral Biology, Paris, France and Centre de Recherche des Cordeliers, Sorbonne Universite, INSERM UMRS 1138, Molecular Oral Pathophysiology, Paris, France

<sup>4</sup>Office of Research Affairs, Faculty of Dentistry, Chulalongkorn University, Bangkok THAILAND 10330

<sup>5</sup>Department of Anatomy, Faculty of Dentistry, Chulalongkorn University, Bangkok THAILAND 10330

**Corresponding author:**

Thanaphum Osathanon, DDS, PhD

Dental Stem Cell Biology Research Unit, Faculty of Dentistry,

Chulalongkorn University,

34 Henri-Dunant Rd. Pathumwan, Bangkok, 10330 Thailand

Tel: +66-2-218-8885, Fax: +66-2-218-8870

Email: [thanaphum.o@chula.ac.th](mailto:thanaphum.o@chula.ac.th)

**Table S1:** The oligonucleotide sequences

| Genes                          | Forward sequences               | Reverse sequences                     | GenBank<br>Accession Number | Size<br>(bp) |
|--------------------------------|---------------------------------|---------------------------------------|-----------------------------|--------------|
| <i>GAPDH</i>                   | 5'-TCATGGGTGTGAACCATGAGAA-3'    | 5'-GGCATGGACTGTGGTCATGAG-3'           | NM_002046.3                 | 146          |
| <i>ALP</i>                     | 5'-CGAGATACAAGCACTCCCACTTC-3'   | 5'-CTGTTCACTCGTACTGCATGTC-3'          | NM_000478.3                 | 120          |
| <i>ANKH</i>                    | 5'-GAGGTGACAGACATCGTGG-3'       | 5'-CCTTTAAATCAAGGCCTCTTTCATTAC-3'     | NM_054027.6                 | 177          |
| <i>AXIN2</i>                   | 5'-ATGATTCCATGTCCATGACG-3'      | 5'-CTTCACACTGCGATGCATTT-3'            | NM_001363813.1              | 101          |
| <i>COL1A1</i>                  | 5'-GTGCTAAAGGTGCCAATGGT-3'      | 5'-ACCAGGTTCAACCGCTGTTAC-3'           | NM_000088.4                 | 128          |
| <i>DMPI</i>                    | 5'- CAGGAGCACAGGAAAAGGAG -3'    | 5'- CTGGTGGTATCTTGGGCACT -3'          | NM_004407.3                 | 213          |
| <i>DSPP</i>                    | 5'-ATATTGAGGGCTGGAATGGGGA-3'    | 5'-TTTGTGGCTCCAGCATTGTCA-3'           | NM_014208.3                 | 136          |
| <i>ENPP</i>                    | 5'-AAATATGCAAGCCCTCTTTGT-3'     | 5'-TTTAGAAGGTGGTTAAGACTTCCATGA-3'     | NM_006208.3                 | 162          |
| <i>LRP8</i>                    | 5'-AAGTGTGTACCTGCCTCGTG-3'      | 5'-CACTCGTTCAGCCAGGTAGC-3'            | NM_033300.4                 | 92           |
| <i>MMP11</i>                   | 5'-GGCCCTAAAGGTATGGAGCG-3'      | 5'-TCTCGGTGAGTCTTGGGGAA-3'            | NM_005940.5                 | 168          |
| <i>OCN</i>                     | 5'-CTTTGTGTCCAAGCAGGAGG-3'      | 5'-CTGAAAGCCGATGTGGTCAG-3'            | NM_199173.6                 | 166          |
| <i>OSX</i>                     | 5'-GCCAGAAGCTGTGAAACCTC-3'      | 5'-GCTGCAAGCTCTCCATAACC-3'            | NM_001300837.2              | 161          |
| <i>RUNX2</i>                   | 5'-ATGATGACACTGCCACCTCTGA-3'    | 5'-GGCTGGATAGTGCATTCGTG-3'            | NM_001024630.3              | 167          |
| <i>LPL</i>                     | 5'-GAGATTTCTCTGTATGGCACC-3'     | 5'-CTGCAAATGAGACACTTTCTC-3'           | NM_000237.3                 | 276          |
| <i>PPAR<math>\gamma</math></i> | 5'-CCAGTGGTTGCAGATTACAAGTATG-3' | 5'-TTGTAGAGCTGAGTCTTCTCAGAATAATAAG-3' | NM_138712.5                 | 110          |
